# Supplementary material for: Behavioral Ecology of the Coffee White Stem Borer: Toward Ecology-Based Pest Management of India's Coffee Plantations
Source: Frontiers journal article supplement (doi:10.3389/fevo.2021.607555), 2021-02-09
Supplement: Table_2.docx [file Table_2.docx]

| **Compounds** | **Arabica R.A% a (n=4)** | **R.A% of LB at 1 hr a (n=4)** | **R.A% of LB at 8 hr a (n=4)** |
| --- | --- | --- | --- |
| (E)-2-hexenal | 8.0 | 12.9 | 10.5 |
| (Z)-3-hexen-1-ol | 61.9 | 55.8 | 56.0 |
| (E)-2-hexen-1-ol | 27.9 | 29.5 | 30.5 |
| (+/-)-linalool | 2.2 | 1.7 | 3.0 |

a - Solid Phase Micro Extraction (SPME) sampling method was used, LB - Leaf blend made based on arabica coffee leaves, R.A % - Relative Area percentage, n - number of replicates
