# Supplementary material for: Behavioral Ecology of the Coffee White Stem Borer: Toward Ecology-Based Pest Management of India's Coffee Plantations
Source: Frontiers journal article supplement (doi:10.3389/fevo.2021.607555), 2021-02-09
Supplement: Table_4.docx [file Table_4.docx]

|  |  |  |  |  |  |
| --- | --- | --- | --- | --- | --- |
|  | **Reference Relative Area % of Silver Oak a** | |  | **WB2 Relative Area % a** | |
| **Compound** | **Minimum (n=6)** | **Maximum (n=6)** |  | **At 1 hr (n=4)** | **At 8 hr (n=4)** |
| (+/-)-α-pinene | 2.2 | 50.2 |  | 7.2 | 9.4 |
| (-)-β-pinene | 3.0 | 59.5 |  | 9.0 | 11.8 |
| (E)-β-caryophyllene | 15.1 | 34.9 |  | 6.0 | 15.2 |
| (R)-(+)-limonene | 34.8 | 94.8 |  | 77.9 | 63.7 |

a - Solid Phase Micro Extraction (SPME) sampling method was used, n - no of replicates, R.A% - Relative Area Percentage, WB2 - Wood blend made based on attractive cut wood
