# Supplementary material for: Behavioral Ecology of the Coffee White Stem Borer: Toward Ecology-Based Pest Management of India's Coffee Plantations
Source: Frontiers journal article supplement (doi:10.3389/fevo.2021.607555), 2021-02-09
Supplement: Table_5.docx [file Table_5.docx]

| **Compounds** | **Total no of responses** | **Male** | **Female** |
| --- | --- | --- | --- |
| *(Z)*-3-hexen-1-ol | 10 | 4 | 6 |
| acetophenone | 7 | 1 | 6 |
| 2,6,11-trimethyldodecane | 6 | 2 | 4 |
| *(E)*-2-hexenal | 4 | 1 | 3 |
| Unknown 1 | 6 | 1 | 5 |
| Unknown 2 | 2 | 1 | 1 |
| tetradec-1-ene | 1 | 0 | 1 |
| benzyl alcohol | 5 | 0 | 5 |
| Unknown 3 | 4 | 1 | 3 |
| caffeine | 2 | 0 | 2 |
| n-dodecane | 1 | 0 | 1 |
| Unknown 4 | 2 | 1 | 1 |
| methyl salicylate | 2 | 0 | 2 |
| Unknown 5 | 1 | 0 | 1 |
| 5-ethyl-2,5-dihydrofuran-2-one | 2 | 0 | 2 |
| *(E)*-2-hexen-1-ol | 4 | 0 | 4 |
| Unknown 6 | 1 | 0 | 1 |
| *(E)*-3-hexanoic acid | 2 | 0 | 2 |
